# Supplementary material
Source: Royal Society of Chemistry journal article supplement (doi:10.1039/d6cp01456a)
Supplement: d6cp01456a1.pdf [file d6cp01456a1.pdf]

# Photogalvanic effect of 2D van der Waals heterostructure $M_2XT_2/SiC$ by first-principles calculations

Meng Guo<sup>ab</sup>, Taifei Zhao<sup>ab</sup>, Zhen Cui<sup>ab\*</sup>,

<sup>a</sup>*School of Automation and Information Engineering,*

*Xi'an University of Technology, Xi'an, 710048, P.R. China*

<sup>b</sup>*Xi'an Key Laboratory of Wireless Optical Communication and Network Research,*

*Xi'an University of Technology, Xi'an, 710048, P.R. China*

*\*Corresponding author: Zhen Cui (Email: zcui@xaut.edu.cn)*

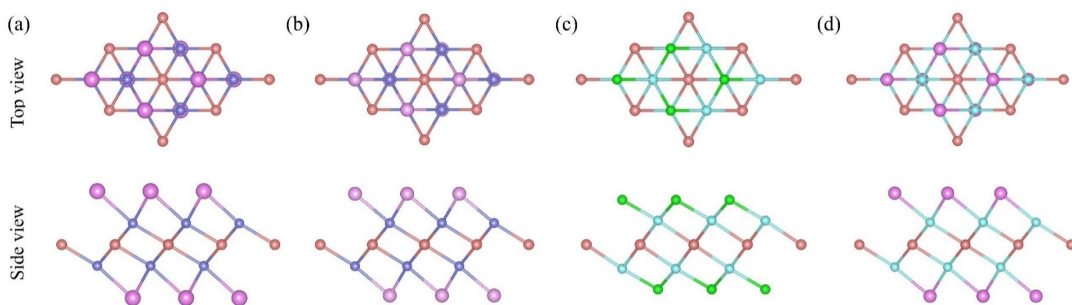

Fig. S1. Optimized top and side views of unit cell for four  $M_2XT_2$  MXenes monolayers ( $Sc_2CBr_2$ ,  $Sc_2CCl_2$ ,  $Y_2CF_2$ , and  $Y_2CCl_2$ ). The atoms are color-coded as follows: Sc (blue), Br (purple), Cl (light purple), Y (light blue), and F (cyan).

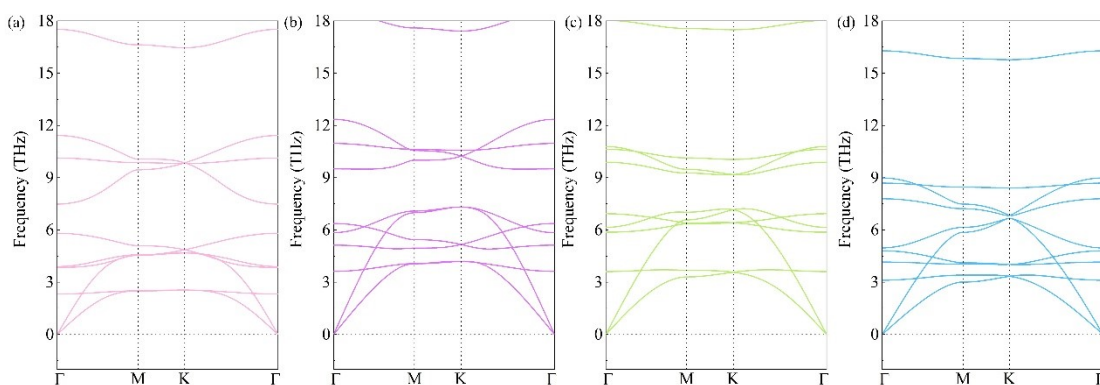

Fig. S2. Phonon dispersion spectra of unit cell for four  $M_2XT_2$  MXenes monolayers ( $Sc_2CBr_2$  (pink lines),  $Sc_2CCl_2$  (purple lines),  $Y_2CF_2$  (cyan lines), and  $Y_2CCl_2$  (blue lines)).

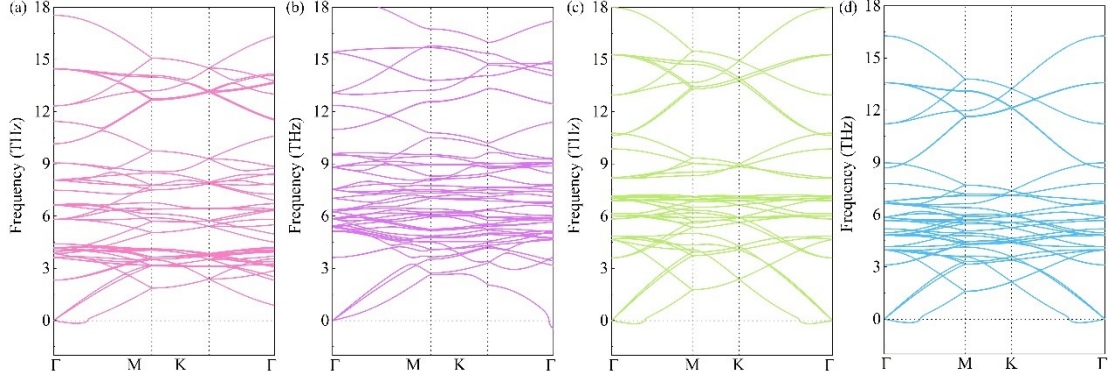

Fig. S3. Phonon dispersion spectra of the supercells for four  $M_2XT_2$  MXenes monolayers ( $Sc_2CBr_2$  (pink lines),  $Sc_2CCl_2$  (purple lines),  $Y_2CF_2$  (cyan lines), and  $Y_2CCl_2$  (blue lines)).

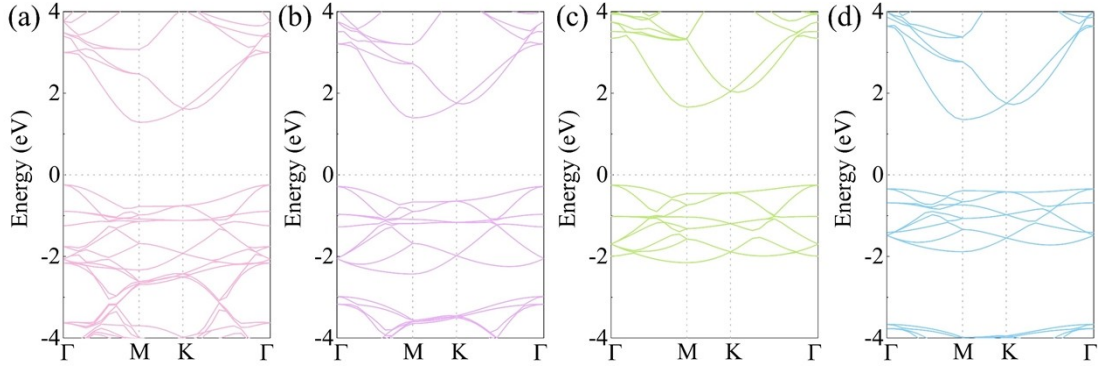

Fig. S4. Band structures of the supercells for four  $M_2XT_2$  MXenes monolayers ( $Sc_2CBr_2$  (pink lines),  $Sc_2CCl_2$  (purple lines),  $Y_2CF_2$  (cyan lines), and  $Y_2CCl_2$  (blue lines)).

Table S1. The structural and electronic parameters including  $a$ , PBE bandgaps ( $E_g^{PBE}$ ), hybrid HSE06 bandgaps ( $E_g^{HSE}$ ), and VBM/CBM positions of unit cells for isolated monolayers  $Sc_2CBr_2$ ,  $Sc_2CCl_2$ ,  $Y_2CF_2$ , and  $Y_2CCl_2$ .

| Type        | $a$ (Å) | $E_g^{PBE}$ (eV) | $E_g^{HSE}$ (eV) | VBM/CBM     |
|-------------|---------|------------------|------------------|-------------|
| $Sc_2CBr_2$ | 3.52    | 0.71             | 1.42             | M/ $\Gamma$ |
| $Sc_2CCl_2$ | 3.43    | 0.87             | 1.58             | M/ $\Gamma$ |
| $Y_2CF_2$   | 3.55    | 1.10             | 1.81             | M/ $\Gamma$ |

|            |      |      |      |             |
|------------|------|------|------|-------------|
| $Y_2CCl_2$ | 3.69 | 0.94 | 1.61 | M/ $\Gamma$ |
|------------|------|------|------|-------------|

Table S2. The geometric parameters, including  $a$ ,  $E_g^{\text{PBE}}$ ,  $E_g^{\text{HSE}}$ , and VBM/CBM positions for supercells  $Sc_2CBr_2$ ,  $Sc_2CCl_2$ ,  $Y_2CF_2$ , and  $Y_2CCl_2$ .

| Type        | $a$ (Å) | $E_g^{\text{PBE}}$ (eV) | $E_g^{\text{HSE}}$ (eV) | VBM/CBM     |
|-------------|---------|-------------------------|-------------------------|-------------|
| $Sc_2CBr_2$ | 6.08    | 0.70                    | 1.52                    | M/ $\Gamma$ |
| $Sc_2CCl_2$ | 5.95    | 0.87                    | 1.68                    | M/ $\Gamma$ |
| $Y_2CF_2$   | 6.15    | 1.11                    | 1.91                    | M/ $\Gamma$ |
| $Y_2CCl_2$  | 6.39    | 0.94                    | 1.69                    | M/ $\Gamma$ |

Table S3. The formation energies of all configurations of the four types of HJs under different stacking schemes.

| Model           | Pattern-A | Pattern-B | Pattern-C | Pattern-D | Pattern-E | Pattern-F |
|-----------------|-----------|-----------|-----------|-----------|-----------|-----------|
| $Sc_2CBr_2/SiC$ | -3.298    | -3.298    | -3.298    | -3.300    | -3.298    | -3.300    |
| $Sc_2CCl_2/SiC$ | -2.657    | -2.658    | -2.658    | -2.659    | -2.658    | -2.658    |
| $SiC/Y_2CF_2$   | -0.856    | -0.857    | -0.857    | -0.857    | -0.859    | -0.858    |
| $SiC/Y_2CCl_2$  | -0.624    | -0.624    | -0.624    | -0.624    | -0.625    | -0.624    |

Table S4. The  $a$ ,  $E_g^{\text{PBE}}$  (eV),  $E_g^{\text{HSE}}$  (eV), and  $\Phi$  of  $Sc_2CBr_2/SiC$ ,  $Sc_2CCl_2/SiC$ ,  $SiC/Y_2CF_2$ , and  $SiC/Y_2CCl_2$  after optimization.

| Type            | $a$ (Å) | $E_g^{\text{PBE}}$ (eV) | $E_g^{\text{HSE}}$ (eV) | $\Phi$ (eV) |
|-----------------|---------|-------------------------|-------------------------|-------------|
| $Sc_2CBr_2/SiC$ | 6.14    | 0.19                    | 0.87                    | 4.99        |
| $Sc_2CCl_2/SiC$ | 6.07    | 0.04                    | 0.72                    | 5.09        |
| $SiC/Y_2CF_2$   | 6.17    | 1.14                    | 1.94                    | 4.19        |
| $SiC/Y_2CCl_2$  | 6.27    | 0.11                    | 0.77                    | 5.06        |

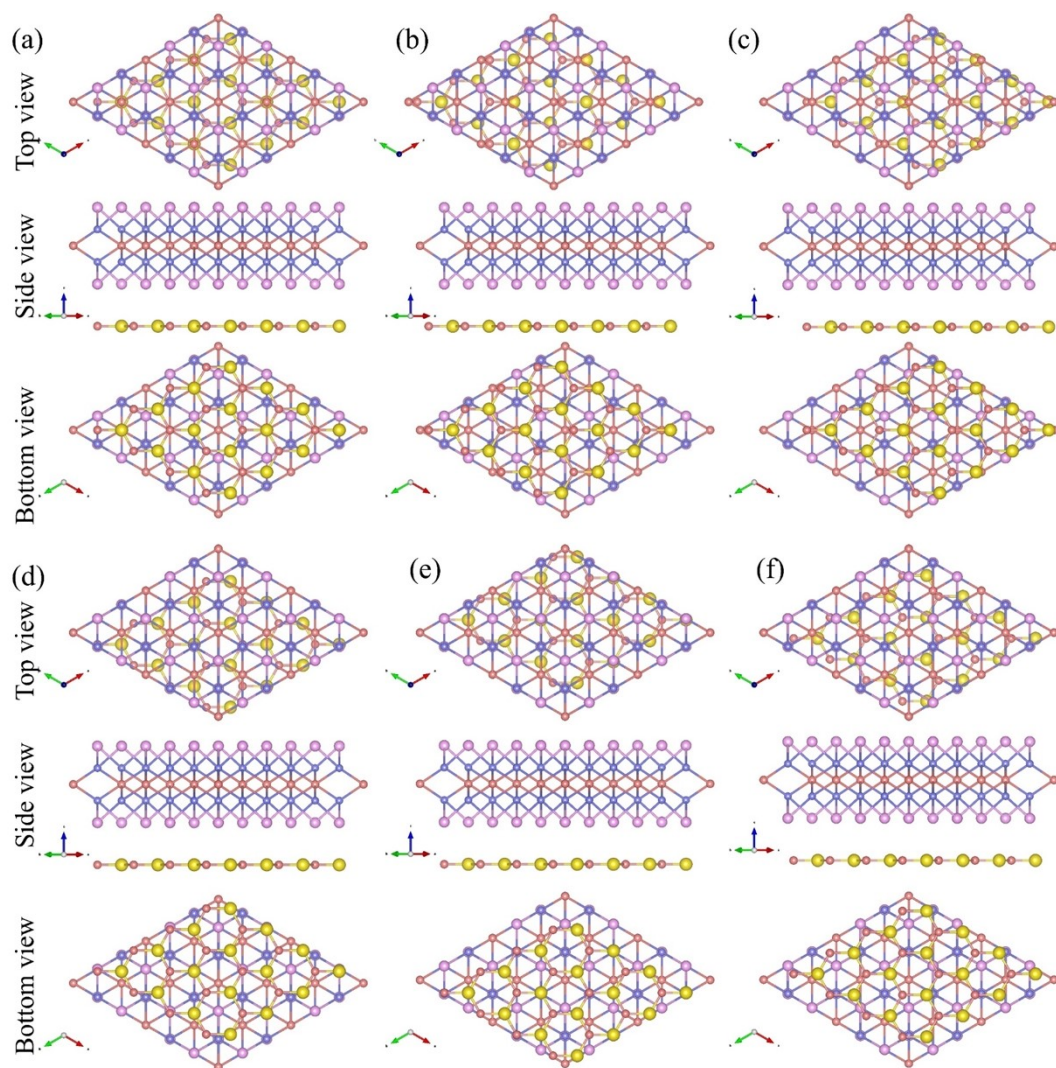

Fig. S5. Six vertical stacking models of Sc<sub>2</sub>CCl<sub>2</sub>/SiC HJ. The atoms are color-coded as follows: Si (yellow), C (orange), Sc (blue), and Cl (light purple).

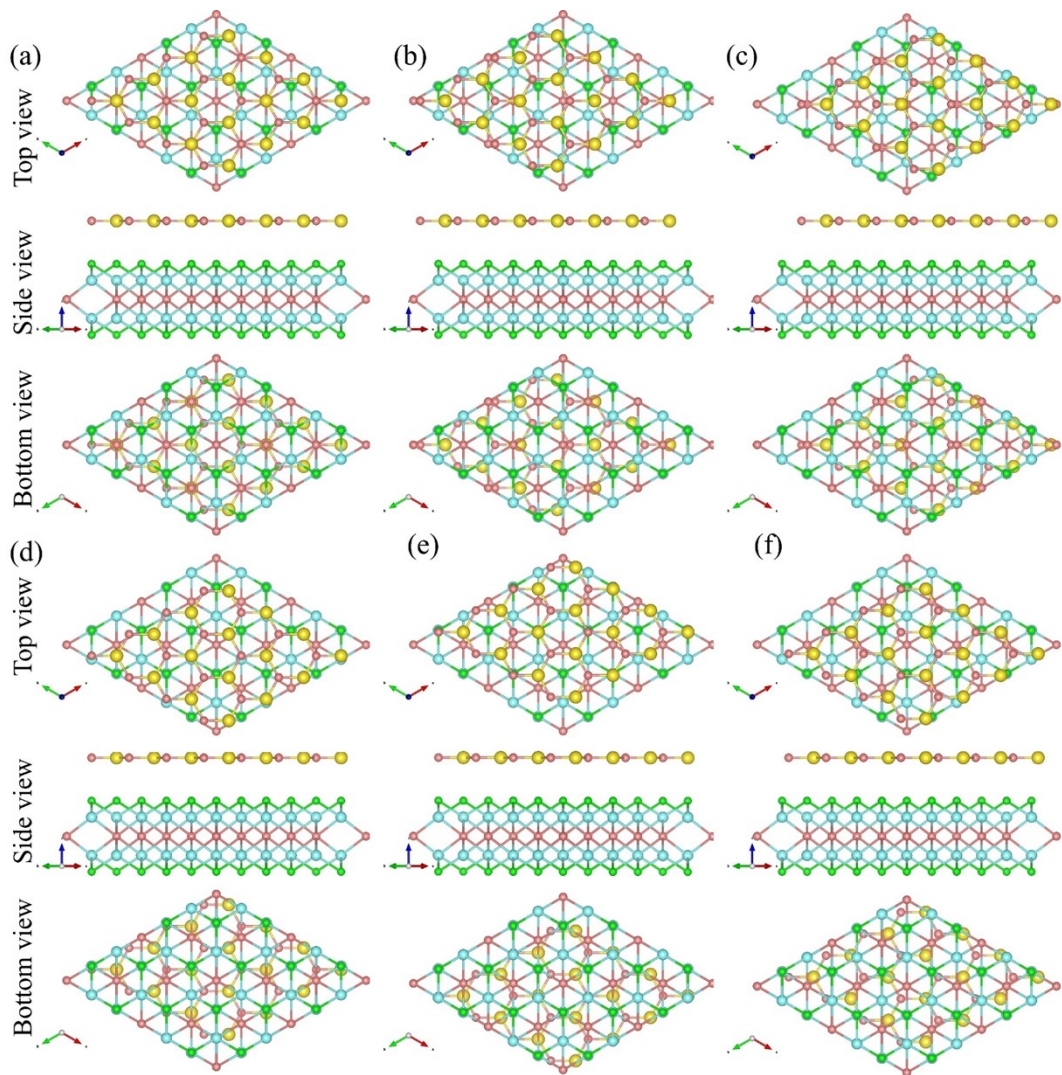

Fig. S6. Six vertical stacking models of SiC/Y<sub>2</sub>CF<sub>2</sub> HJ. The atoms are color-coded as follows: Si (yellow), C (orange), Y (light blue), and F (cyan).

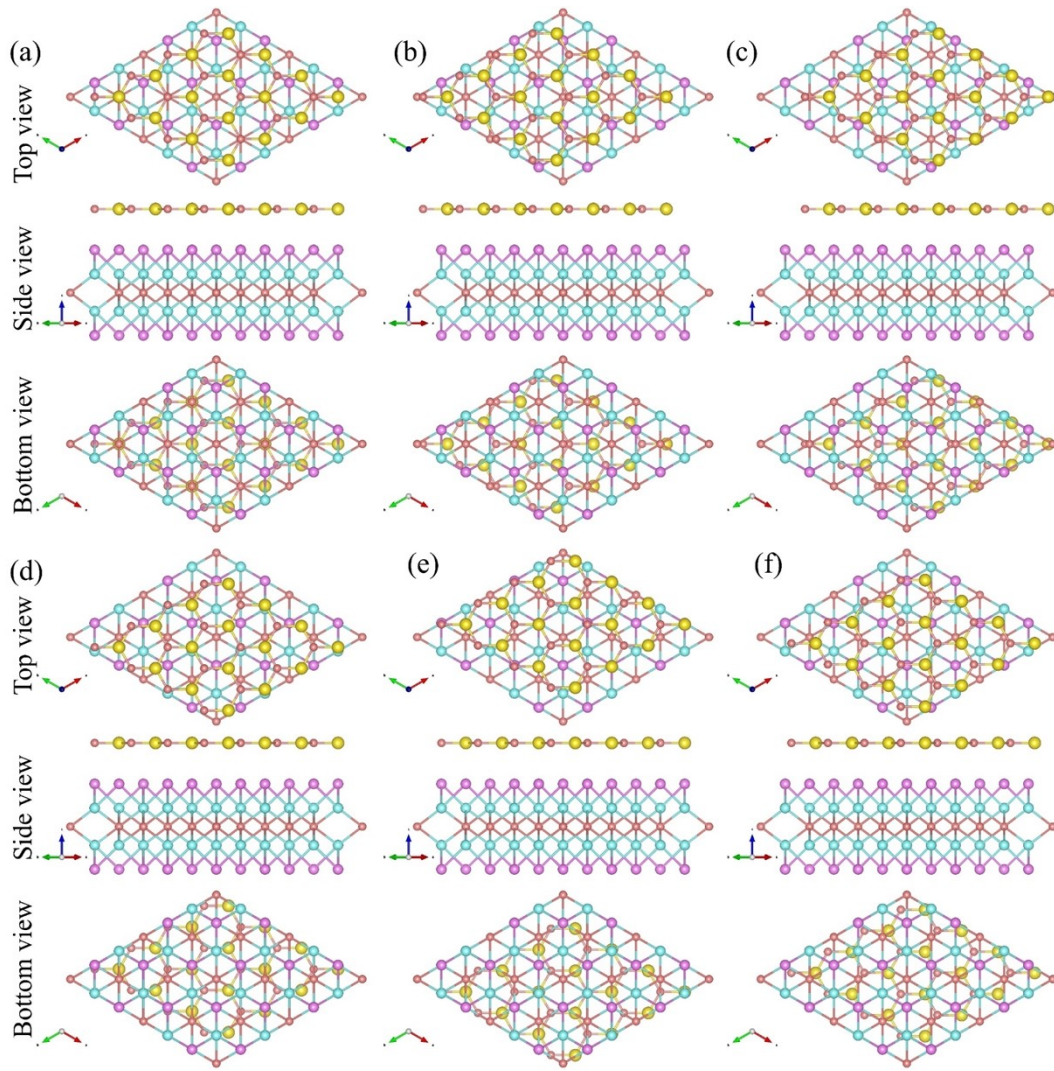

Fig. S7. Six vertical stacking models of SiC/Y<sub>2</sub>CCl<sub>2</sub> HJ. The atoms are color-coded as follows: Si (yellow), C (orange), Cl (light purple), and Y (light blue).

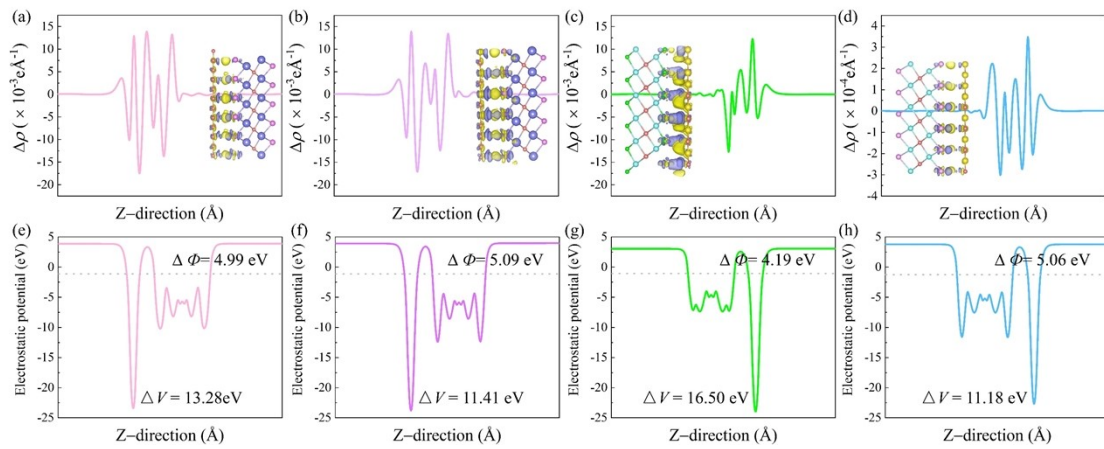

Fig. S8. The Plane-averaged CD and electrostatic potential staggered of Sc<sub>2</sub>CBr<sub>2</sub>/SiC (pink lines), Sc<sub>2</sub>CCl<sub>2</sub>/SiC (purple lines), SiC/Y<sub>2</sub>CF<sub>2</sub> (cyan lines), and SiC/Y<sub>2</sub>CCl<sub>2</sub> (blue lines) after optimization.

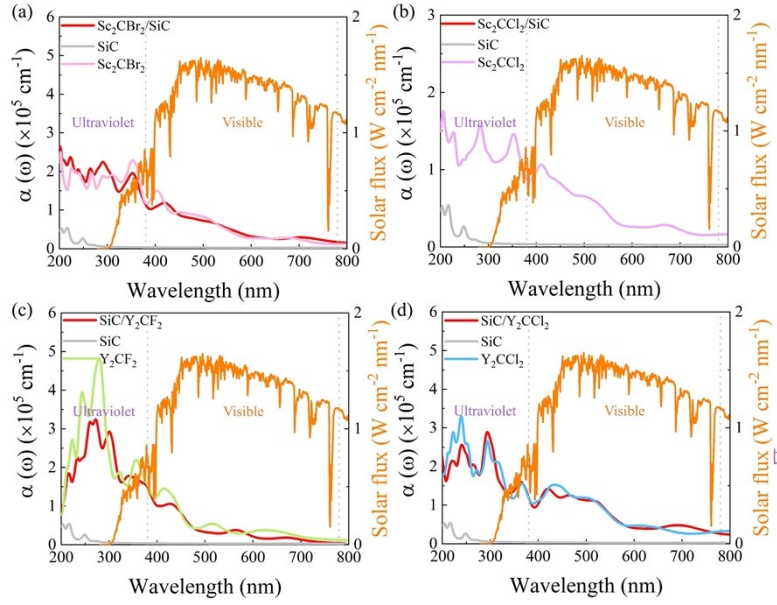

Fig. S9. The optical absorption spectrum of  $\text{Sc}_2\text{CBr}_2$ ,  $\text{Sc}_2\text{CCl}_2$ ,  $\text{Y}_2\text{CF}_2$ ,  $\text{Y}_2\text{CCl}_2$ ,  $\text{SiC}$ ,  $\text{Sc}_2\text{CBr}_2/\text{SiC}$ ,  $\text{Sc}_2\text{CCl}_2/\text{SiC}$ ,  $\text{SiC}/\text{Y}_2\text{CF}_2$ , and  $\text{SiC}/\text{Y}_2\text{CCl}_2$  after optimization.

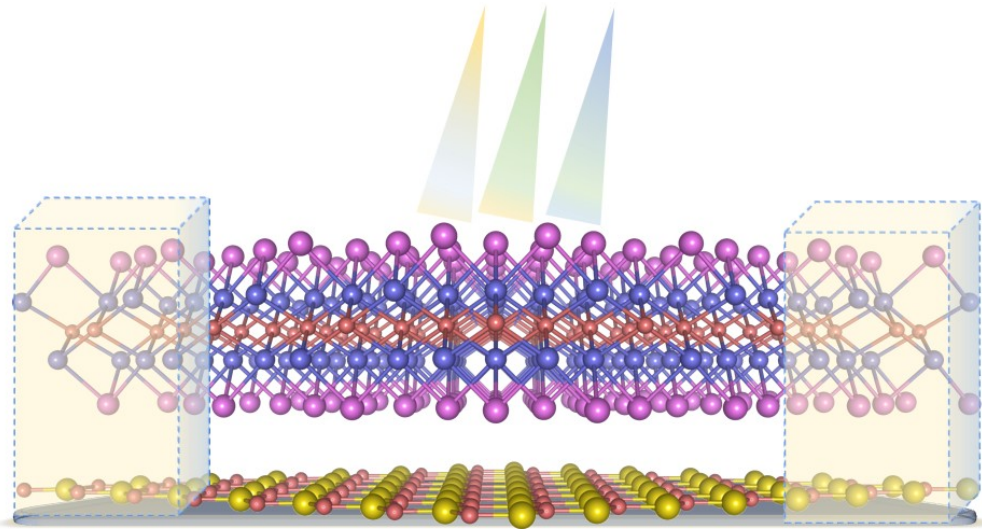

Fig. S10. Photocurrent model of  $\text{Sc}_2\text{CBr}_2/\text{SiC}$ ,  $\text{Sc}_2\text{CCl}_2/\text{SiC}$ ,  $\text{SiC}/\text{Y}_2\text{CF}_2$ , and  $\text{SiC}/\text{Y}_2\text{CCl}_2$  HJs.
